# Supplementary material for: A Colorimetric Ag+ Probe for Food Real-Time Visual Monitoring
Source: MDPI journal article supplement (doi:10.3390/nano12091389), 2022-04-19
Supplement: s1 [file s1]

# A Colorimetric Ag<sup>+</sup> Probe for Food Real-Time Visual Monitoring

Jiahang Yu, Jun Qi, Zhen Li, Huixin Tian and Xinglian Xu \*

Jiangsu Collaborative Innovation Center of Meat Production and Processing, Quality and Safety Control,  
College of Food Science and Technology, Nanjing Agricultural University, Nanjing 210095, China; 2019208009@njau.edu.cn (J.Y.); junqi86@hotmail.com (J.Q.); 2018808149@njau.edu.cn; (Z.L.); hxtian98@163.com (H.T.)

\* Correspondence: xlxus@njau.edu.cn

**Abstract:** Monitoring food quality throughout

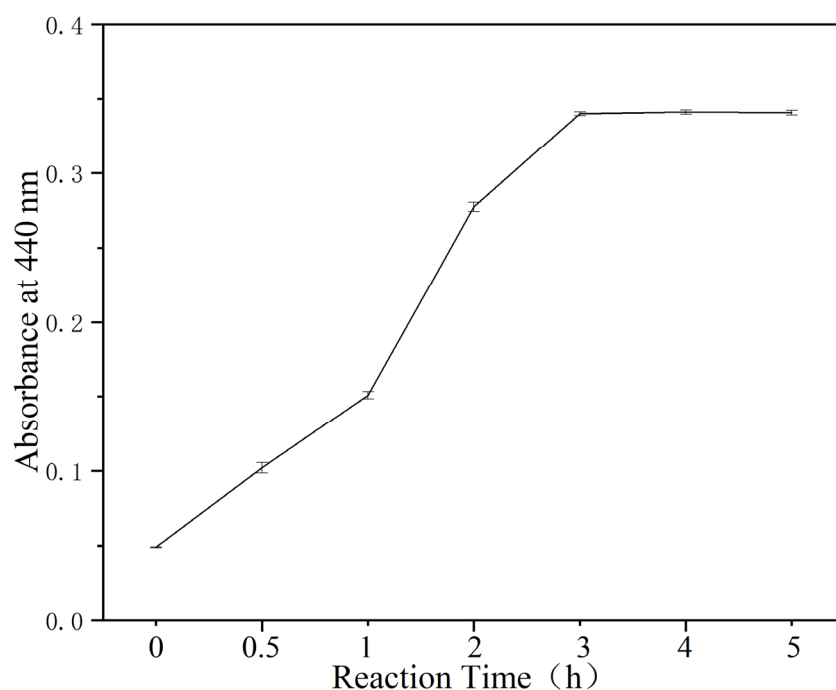

**Figure S1.** Absorbance at 440 nm for the reaction mixture after different incubation times (0, 0.5, 1, 2, 3, 4, and 5 h).

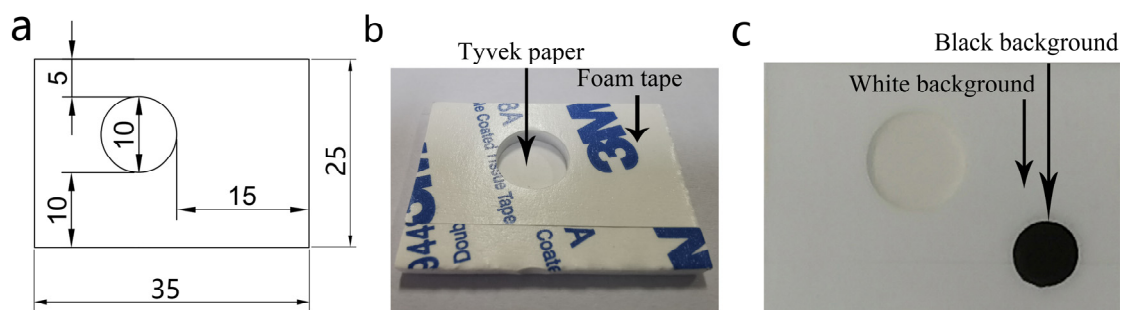

**Figure S2.** Preparation of the colorimetric sensing label: (a) CAD top-side view of the colorimetric gel tank; (b) entity graph of the colorimetric gel tank; it was cut from foam tape with a thickness of 2 mm. There was one round hole with a diameter of 10 mm in the middle, and the capacity was approximately 0.16 mL. The bottom was sealed with Tyvek paper, which has excellent breathability and

safety. (c) Sample graph of a colorimetric sensing label. The colorimetric Ag<sup>+</sup> probe was added to the round holes, and a 6 mm diameter black paper was pasted at the bottom right as the black background.

**Table S1.** Comparison of the analytical performance of methods used for amine detection.

| Target analytes | Methods                  | Probes                                     | Linear range                    | LOD                        | Ref.      |
|-----------------|--------------------------|--------------------------------------------|---------------------------------|----------------------------|-----------|
| NH <sub>3</sub> | Colorimetry              | Ag <sup>+</sup> probe                      | 2-100 $\mu$ M                   | 2 $\mu$ M                  |           |
|                 |                          |                                            | 0.07-3.5 mg/L                   | 0.07 mg/L                  |           |
| Putrescine      | Colorimetry              | Ag <sup>+</sup> probe                      | 2-100 $\mu$ M                   | 2 $\mu$ M                  |           |
|                 |                          |                                            | 0.322-16.1 mg/L                 | 0.322 mg/L                 |           |
| Cadaverin       | Colorimetry              | Ag <sup>+</sup> probe                      | 2-100 $\mu$ M                   | 2 $\mu$ M                  | This work |
|                 |                          |                                            | 0.35-17.51 mg/L                 | 0.35 mg/L                  |           |
| Methylamine     | Colorimetry              | Ag <sup>+</sup> probe                      | 5-100 $\mu$ M                   | 5 $\mu$ M                  |           |
|                 |                          |                                            | 0.338-6.75 mg/L                 | 0.338 mg/L                 |           |
| Trimethylamine  | Colorimetry              | Ag <sup>+</sup> probe                      | 5-100 $\mu$ M                   | 5 $\mu$ M                  |           |
|                 |                          |                                            | 0.296-5.91 mg/L                 | 0.296 mg/L                 |           |
| Tyramine        | Colorimetry              | Ag <sup>+</sup> probe                      | 5-100 $\mu$ M                   | 5 $\mu$ M                  |           |
|                 |                          |                                            | 0.686-13.72 mg/L                | 0.686 mg/L                 |           |
| NH <sub>3</sub> | Voltammetry              | CSFET                                      | 0.01-0.1 mg/L                   | 0.01 mg/L                  | [41]      |
|                 | Voltammetry              | PTS-PAni                                   | 5-40 ppm                        | 5 ppm                      | [42]      |
|                 | Voltammetry              | Nanotube/Metalloporphyrin                  | 0.5-20 ppm                      | 0.5 ppm                    | [43]      |
|                 | Ratiometric fluorescence | Zn <sub>2</sub> (bpdC) <sub>2</sub> (bpee) | 0.28-10 mg/L                    | -                          | [44]      |
|                 | Fluorescence             | SNNU-88                                    | 5-100 mg/L                      | -                          | [45]      |
|                 | Fluorescence             | FJU-56                                     | 0-10 mg/L                       | 1.38 mg/L                  | [46]      |
| Dimethylamine   | Voltammetry              | MIP                                        | 0.0005-0.01 mol L <sup>-1</sup> | 0.0005 mol L <sup>-1</sup> | [47]      |
| Trimethylamine  | Voltammetry              | MnPc                                       | 0.1-0.6 ppm                     | 0.1 ppm                    | [48]      |
| Putrescine      | Ratiometric              | PFTBT-COOH/CS-graft-OA                     | 0-10.12 mg/L                    | 2.02 mg/L                  | [42]      |
|                 | Fluorescence             | OPA                                        | 0.07-17.63 mg/L                 | 0.039 mg/L                 | [49]      |
|                 | Fluorescence             | CdSe/ZnS QDs                               | 0.45-2.25 mM                    | 0.11 mM                    | [50]      |
|                 | SERS                     | AuNPs                                      | 0.027-0.80 mM                   | 0.027 mM                   | [51]      |
|                 | SERS                     | AgNPs                                      | 0-1.80 mM                       | -                          | [52]      |
|                 | Voltammetry              | Carbon nanotubes                           | 4.5-720 $\mu$ M                 | 3.78 $\mu$ M               | [53]      |
| Histamine       | Voltammetry              | AgNPs                                      | 1-500 $\mu$ M                   | 0.049 $\mu$ M              | [54]      |
|                 | SERS                     | SiO <sub>2</sub> @Au@Ag                    | 0.1-0.8 mM                      | 0.1 mM                     | [55]      |
|                 | Ratiometric Fluorescence | EuMOF-FITC                                 | 2.78-41.68 mg/L                 | 1.11 mg/L                  | [56]      |
